# Supplementary material for: Wall loss of semi-volatile organic compounds in a Teflon bag chamber for the temperature range of 262–298 K: mechanistic insight on temperature dependence
Source: Copernicus journal article supplement (doi:10.5194/amt-17-755-2024), 2024-01-31
Supplement: Supplementary file 1 [file amt-17-755-2024-supplement.pdf]

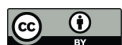

*Supplement of*

**Wall loss of semi-volatile organic compounds in a Teflon bag chamber for the temperature range of 262–298 K: mechanistic insight on temperature dependence**

**Longkun He et al.**

*Correspondence to:* Mikinori Kuwata ([kuwata@pku.edu.cn](mailto:kuwata@pku.edu.cn)) and Yingjun Liu ([yingjun.liu@pku.edu.cn](mailto:yingjun.liu@pku.edu.cn))

The copyright of individual parts of the supplement might differ from the article licence.

**Table S1.** List of n-alkanes used for the present study, along with the saturation vapor pressure at 298 K predicted by the EVAPORATION group contribution method (Comperolle et al., 2011). All the chemicals were purchased from Konoscience.

| compound name         | carbon number | CAS number | purity | saturation vapor pressure (Pa) |
|-----------------------|---------------|------------|--------|--------------------------------|
| <i>n</i> -tetradecane | 14            | 629-59-4   | 99%    | 2.8E+00                        |
| <i>n</i> -pentadecane | 15            | 629-62-9   | 98%    | 9.2E-01                        |
| <i>n</i> -hexadecane  | 16            | 544-76-3   | 98%    | 3.0E-01                        |
| <i>n</i> -heptadecane | 17            | 629-78-7   | 99%    | 1.0E-01                        |
| <i>n</i> -octadecane  | 18            | 593-45-3   | 99%    | 3.3E-02                        |
| <i>n</i> -nonadecane  | 19            | 629-92-5   | 98%    | 1.1E-02                        |

**Table S2.** Abundances of diisobutyl phthalate (DiBP) and dibutyl phthalate (DnBP) in and outside of the chamber (*i.e.*, room air in the laboratory) detected by the SV-TAG during one experiment at room temperature.<sup>a</sup>

| time after injection (min)              | peak area (counts) <sup>b</sup> |         | ratio of chamber air to room air |       |
|-----------------------------------------|---------------------------------|---------|----------------------------------|-------|
|                                         | DiBP                            | DnBP    | DiBP                             | DnBP  |
| chamber background (0)                  | 15618                           | 12532   | 0.44%                            | 0.47% |
| 73                                      | 16197                           | 15266   | 0.46%                            | 0.57% |
| 133                                     | 19457                           | 24483   | 0.55%                            | 0.91% |
| 206                                     | 18029                           | 20958   | 0.51%                            | 0.78% |
| 406                                     | 18920                           | 21996   | 0.53%                            | 0.82% |
| 553                                     | 13110                           | 13526   | 0.37%                            | 0.50% |
| 733                                     | 13073                           | 11923   | 0.37%                            | 0.45% |
| 936                                     | 14189                           | 12866   | 0.40%                            | 0.48% |
| <i>Reference value for the room air</i> | 3539783                         | 2679338 | -                                | -     |

<sup>a</sup> DiBP and DnBP were selected, as they were abundant in the room air of the laboratory. The consistently low concentration in the chamber bag suggested that intrusion of the room air into the experimental setup was minimal.

<sup>b</sup> Peak areas were integrated by Agilent MassHunter Station Quantitative Analysis (10.0, Agilent Technologies, Inc.).

**Table S3.** Fitting and measurement results for room-temperature experiments.

| Compound                         | Experiment shown in Figure 3 <sup>a</sup> |                             |                                       | All three room-temperature experiments <sup>b</sup> |                                           |                     |
|----------------------------------|-------------------------------------------|-----------------------------|---------------------------------------|-----------------------------------------------------|-------------------------------------------|---------------------|
|                                  | $k_1$ (s <sup>-1</sup> )                  | $k_{-1}$ (s <sup>-1</sup> ) | $k_2$ (s <sup>-1</sup> ) <sup>c</sup> | $K_{eq}$                                            | $1/[C_{gas}/C_0]_{\text{at 3 hours}} - 1$ | relative difference |
| C <sub>14</sub> <i>n</i> -alkane | $2.76 \times 10^{-4}$                     | $2.07 \times 10^{-4}$       | $9.39 \times 10^{-6}$                 | $1.00 \pm 0.27$                                     | $1.14 \pm 0.23$                           | $16\% \pm 8\%$      |
| C <sub>15</sub> <i>n</i> -alkane | $2.79 \times 10^{-4}$                     | $2.07 \times 10^{-4}$       | $1.87 \times 10^{-5}$                 | $1.08 \pm 0.19$                                     | $1.23 \pm 0.21$                           | $13\% \pm 6\%$      |
| C <sub>16</sub> <i>n</i> -alkane | $3.41 \times 10^{-4}$                     | $1.84 \times 10^{-4}$       | $2.67 \times 10^{-5}$                 | $1.72 \pm 0.17$                                     | $1.98 \pm 0.14$                           | $16\% \pm 11\%$     |
| C <sub>17</sub> <i>n</i> -alkane | $4.63 \times 10^{-4}$                     | $1.82 \times 10^{-4}$       | $3.60 \times 10^{-5}$                 | $2.73 \pm 0.50$                                     | $3.27 \pm 0.15$                           | $23\% \pm 16\%$     |
| C <sub>18</sub> <i>n</i> -alkane | $6.35 \times 10^{-4}$                     | $2.13 \times 10^{-4}$       | $4.35 \times 10^{-5}$                 | $3.91 \pm 1.27$                                     | $4.85 \pm 0.57$                           | $31\% \pm 23\%$     |
| C <sub>19</sub> <i>n</i> -alkane | $1.17 \times 10^{-3}$                     | $2.25 \times 10^{-4}$       | $4.62 \times 10^{-5}$                 | $8.69 \pm 4.37$                                     | $10.53 \pm 2.80$                          | $35\% \pm 27\%$     |

<sup>a</sup>Optimized parameter sets of the two-layer model used in Figure 3. Best-fit parameters were obtained by the Newton method via Wolfram Mathematica 13.1.

<sup>b</sup>(Mean value)  $\pm$  (standard deviation) are presented.

<sup>c</sup> $k_2$  obtained here was not used in Section 3.3 (characterization of diffusion in the Teflon wall). These fittings overestimated the first-order loss rate constant for low volatile species, C<sub>16</sub> – C<sub>19</sub> *n*-alkanes, as shown in Figure 3.

**Table S4.** List of investigated chemical species by each study in Figure 6.

| Source                       | chemical species                                                                           |
|------------------------------|--------------------------------------------------------------------------------------------|
| This work                    | <i>n</i> -alkanes                                                                          |
| Yeh and Ziemann (2015)       | 2-ketones, 2-alcohols, monoacids, and 1,2-diols                                            |
| Matsunaga and Ziemann (2010) | <i>n</i> -alkanes and 1-alkenes                                                            |
| Yeh and Ziemann (2014)       | alkylnitrates                                                                              |
| Krechmer et al. (2016)       | dihydroxynitrates (DHNs), dihydroxycarbonylnitrates (DHCNs), and trihydroxynitrates (THNs) |

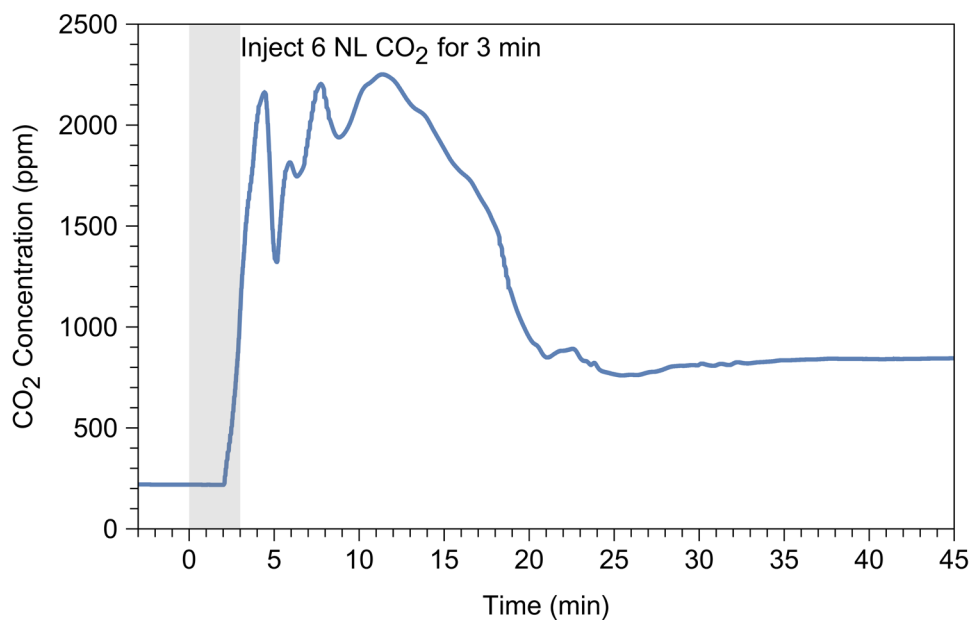

**Figure S1.** Time series of CO<sub>2</sub> concentration in the Teflon chamber for the experiment of testing the chamber volume. 6 NL (normal condition volume, at 273.15 K) of CO<sub>2</sub> was injected during the first 3 mins (gray area in the figure). CO<sub>2</sub> concentration was continuously measured by a CO<sub>2</sub> analyzer (SBA-5, PP System Inc.) at the opposite side of the chamber. The bag volume was determined to be 990 L at room temperature by the change in the CO<sub>2</sub> concentration. The measured volume was used in data analysis. The time scale for the complete mixing of CO<sub>2</sub> was approximately 30 mins.

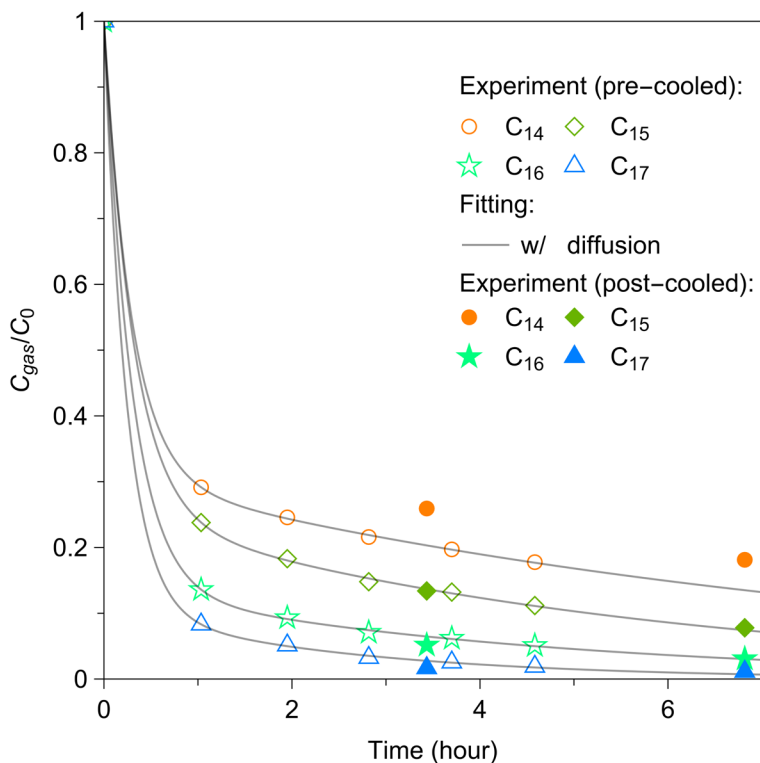

**Figure S2.** Comparison of  $C_{gas}/C_0$  between pre-cooled experiment at 270 K (hollow points) and post-cooled experiment at 270.2 K (solid points). The two-layer kinetic sorption model was employed to fit the pre-cooled chamber data (black solid lines). Results in post-cooled experiments (solid points) align well with the two-layer kinetic model fitting results of pre-cooled experiment (black lines). The consistency between pre- and post-cooled experiment demonstrated the validity of employing post-cooled operation procedure.

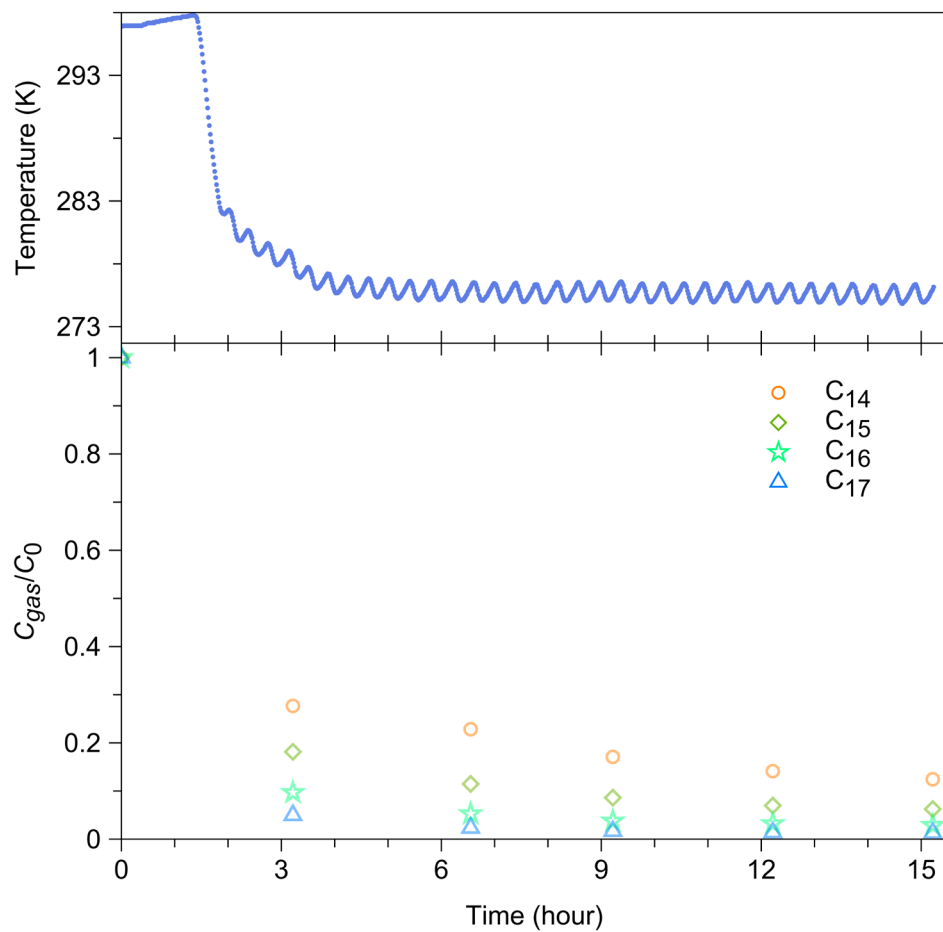

**Figure S3.** The values of  $C_{gas}/C_0$  for C<sub>14</sub>-C<sub>17</sub> *n*-alkanes measured in the gas phase for the experiment at  $275.7 \pm 0.5$  K. The freezer was turned on 1 hour after the completion of the injection.



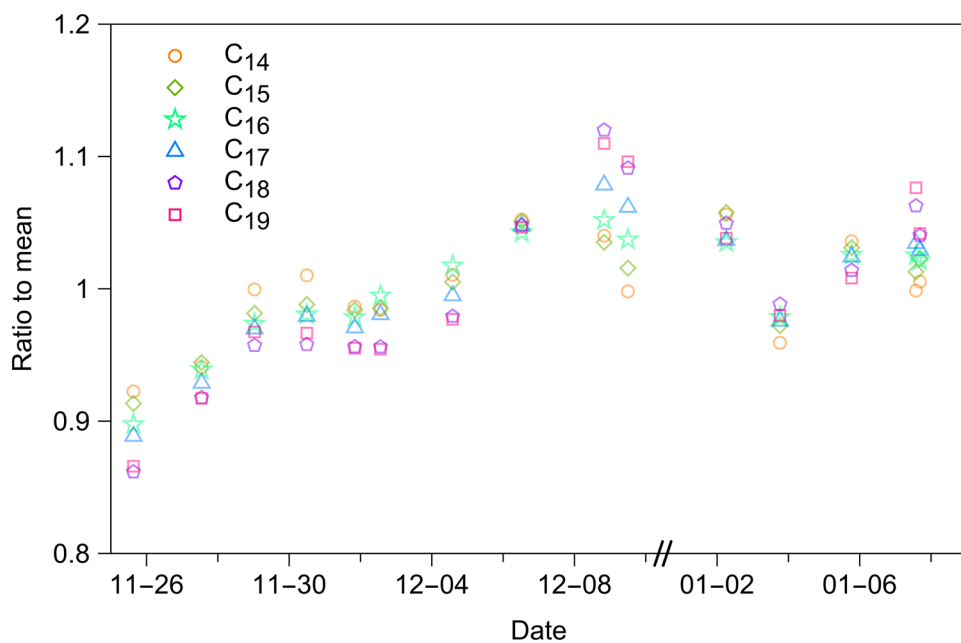

**Figure S4.** Relative changes in the signals of the *n*-alkanes standards during the experiment period. The data suggest that the sensitivity of the SV-TAG was stable within the fluctuation of  $\pm 10\%$ .

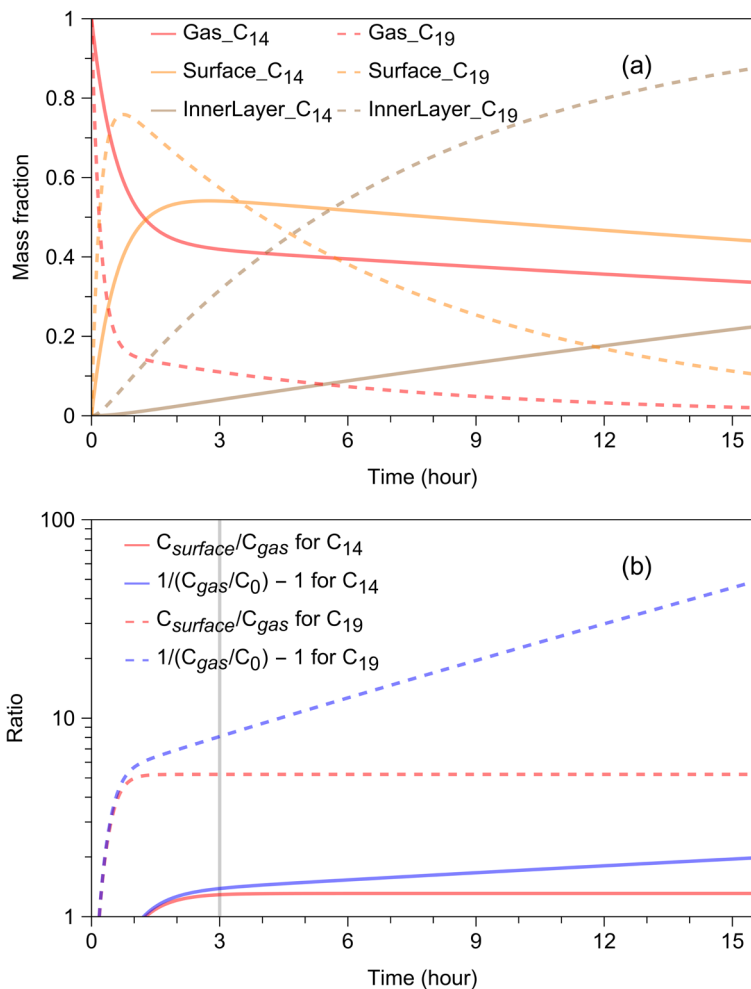

**Figure S5.** Simulation results of the two-layer model for room temperature experiment (Figure 3). (a) Time series of mass fraction of the total injection in gas, surface, and inner layer phases for C<sub>14</sub> and C<sub>19</sub> *n*-alkanes. Solid and dashed lines represent C<sub>14</sub> and C<sub>19</sub> *n*-alkanes respectively. Red, orange, and brown lines represent mass fractions in gas, surface, and inner layer phases respectively. (b) Time series of the ratio of mass in surface and gas phase ( $C_{surface}/C_{gas}$ ) and the ratio of mass not in and in the gas phase ( $1/[C_{gas}/C_0] - 1$ ) for C<sub>14</sub> and C<sub>19</sub> *n*-alkanes. Solid and dashed lines represent C<sub>14</sub> and C<sub>19</sub> *n*-alkanes respectively. Red and blue lines represent the values of  $C_{surface}/C_{gas}$  and  $1/[C_{gas}/C_0] - 1$  respectively. The gray solid line indicates 3 hours as we choose the 3-hour measurements ( $1/[C_{gas}/C_0]_{at\ 3\ hours} - 1$ ) to approximate  $K_{eq}$  in the main text.

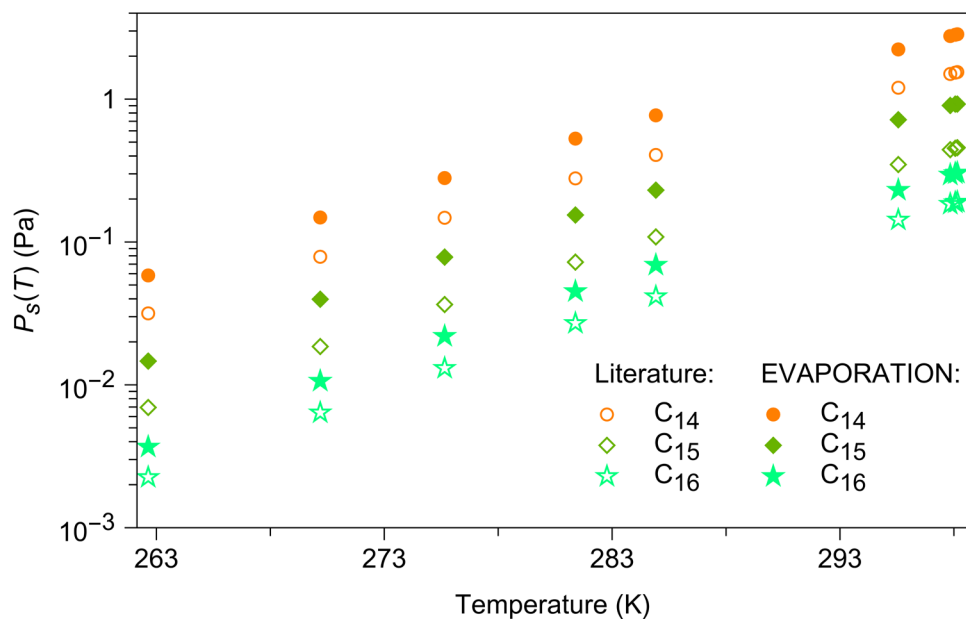

**Figure S6.** Saturation vapor pressures at different experimental temperatures for C<sub>14</sub>-C<sub>16</sub> *n*-alkanes calculated by the EVAPORATION method (Compernelle et al., 2011) and the Clausius–Clapeyron equation with literature values (Fitzpatrick, 2004; Rumble, 2022).

**Text S1.** Uncertainty in approximating  $K_{eq}$  as  $1/[C_{gas}/C_0]_{at\ 3\ hours} - 1$ .

The uncertainties in approximating  $K_{eq}$  as  $1/[C_{gas}/C_0]_{at\ 3\ hours} - 1$  were estimated in two ways. First, the fitting parameters for room-temperature experiment in Figure 3 were used to simulate the kinetic process of wall loss (Figure S5a). Specifically, the values of  $C_{surface}/C_{gas}$  and  $1/[C_{gas}/C_0] - 1$  for  $C_{14}$  and  $C_{19}$  *n*-alkanes were retrieved, which were shown as red and blue lines in Figure S5b. These two *n*-alkanes were chosen, as they represent the highest and lowest volatile species in the room-temperature experiment. For both *n*-alkanes,  $C_{surface}/C_{gas}$  stabilized by 3 hours, suggesting gas-surface partitioning reached equilibrium. In other words,  $K_{eq}$  equals to  $C_{surface}/C_{gas}$  at 3 hours. The discrepancy between the red lines and corresponding blue lines at 3 hours in Figure S5b was thus the bias caused by approximating  $K_{eq}$  as  $1/[C_{gas}/C_0]_{at\ 3\ hours} - 1$ . For  $C_{14}$  and  $C_{19}$  *n*-alkanes, this approximation overestimated the values of  $K_{eq}$  by 7% and 55%, respectively.

The uncertainties were also estimated by the room-temperature experimental results. Since no temperature controlling process was needed for room temperature experiments, the experimental data can be fitted using the two-layer model. Values of  $k_1$  and  $k_{-1}$ , and thus  $K_{eq}$  ( $=k_1/k_{-1}$ ) can be obtained. Three sets of experiments were conducted at room temperature, which allows for estimating the experimental uncertainties as standard deviations among these replicated runs. As shown in Table S3, values of  $K_{eq}$  and  $1/[C_{gas}/C_0]_{at\ 3\ hours} - 1$  agree well within experimental uncertainties. On average, this approximation overestimates  $K_{eq}$  by 22%, which would not influence our main results.

In summary, although the model simulation implies potentially large uncertainties, the comparison based on experimental data demonstrates the validity of the approximation.

## Reference

- Compernelle, S., Ceulemans, K., and Muller, J. F.: EVAPORATION: A new vapour pressure estimation method for organic molecules including non-additivity and intramolecular interactions, *Atmos. Chem. Phys.*, 11, 9431-9450, <https://doi.org/10.5194/acp-11-9431-2011>, 2011.
- Fitzpatrick, R. B.: Haz-Map: information on hazardous chemicals and occupational diseases, *Med. Ref. Services Quart.*, 23, 49-56, [https://doi.org/10.1300/J115v23n02\\_05](https://doi.org/10.1300/J115v23n02_05), 2004.
- Krechmer, J. E., Pagonis, D., Ziemann, P. J., and Jimenez, J. L.: Quantification of gas-wall partitioning in Teflon environmental chambers using rapid bursts of low-volatility oxidized species generated in situ, *Environ. Sci. Technol.*, 50, 5757-5765, <https://doi.org/10.1021/acs.est.6b00606>, 2016.
- Matsunaga, A. and Ziemann, P. J.: Gas-wall partitioning of organic compounds in a Teflon film chamber and potential effects on reaction product and aerosol yield measurements, *Aerosol Sci. Technol.*, 44, 881-892, <https://doi.org/10.1080/02786826.2010.501044>, 2010.
- Rumble, J.: CRC handbook of chemistry and physics, CRC press, ISBN978-1032121710, 2022.
- Yeh, G. K. and Ziemann, P. J.: Alkyl nitrate formation from the reactions of C<sub>8</sub>-C<sub>14</sub> n-alkanes with OH radicals in the presence of NO<sub>x</sub>: Measured yields with essential corrections for gas-wall partitioning, *J. Phys. Chem. A*, 118, 8147-8157, <https://doi.org/10.1021/jp500631v>, 2014.
- Yeh, G. K. and Ziemann, P. J.: Gas-wall partitioning of oxygenated organic compounds: Measurements, structure-activity relationships, and correlation with gas chromatographic retention factor, *Aerosol Sci. Technol.*, 49, 726-737, <https://doi.org/10.1080/02786826.2015.1068427>, 2015.
